# Supplementary material for: Spatial and temporal distribution of drug-resistant tuberculosis and associated risk factors in the central region of Uganda (2019- 2023), a retrospective analysis
Source: Research Square preprint supplement (doi:10.21203/rs.3.rs-5055957/v1), 2024-12-23
Supplement: Supplementary file 1 [file 443dcfeb24a528fd3344a4f7.pdf]

|                   |                                                                                                                                                |
|-------------------|------------------------------------------------------------------------------------------------------------------------------------------------|
| TB Clinic ID      |                                                                                                                                                |
| Date of Diagnosis |                                                                                                                                                |
| Age               |                                                                                                                                                |
| Sex               | <ol style="list-style-type: none"> <li>1. Male</li> <li>2. Female.</li> </ol>                                                                  |
| Marital status    | <ol style="list-style-type: none"> <li>1. Single</li> <li>2. Married</li> <li>3. Divorced</li> <li>4. Widowed</li> <li>5. Separated</li> </ol> |
| Location          | <ol style="list-style-type: none"> <li>1. District</li> <li>2. Sub-county</li> <li>3. Village</li> </ol>                                       |
| Residence         | <ol style="list-style-type: none"> <li>1. Urban</li> <li>2. Rural</li> </ol>                                                                   |
| Occupation        |                                                                                                                                                |
| Weight            |                                                                                                                                                |
| Nutrition status  | <ol style="list-style-type: none"> <li>1. Normal</li> <li>2. Moderate acute malnutrition</li> <li>3. Severe acute malnutrition</li> </ol>      |
| HIV status        | <ol style="list-style-type: none"> <li>1. Positive</li> <li>2. Negative</li> <li>3. Unknown</li> </ol>                                         |
| ART               | <ol style="list-style-type: none"> <li>1. Initiated</li> <li>2. Already initiated</li> </ol>                                                   |
| CPT               | <ol style="list-style-type: none"> <li>1. Initiated</li> <li>2. Already initiated</li> </ol>                                                   |
| Patient type      | <ol style="list-style-type: none"> <li>1. New</li> </ol>                                                                                       |

|                                     |                                                                                                                                                                                                                                                                                  |
|-------------------------------------|----------------------------------------------------------------------------------------------------------------------------------------------------------------------------------------------------------------------------------------------------------------------------------|
|                                     | <ol style="list-style-type: none"> <li>2. Relapse</li> <li>3. Treatment after loss to follow up</li> <li>4. Treatment after failure</li> <li>5. Treatment history unknown</li> </ol>                                                                                             |
| Disease classification              | <ol style="list-style-type: none"> <li>1. BC-TB</li> <li>2. CD-TB</li> <li>3. EP-TB</li> </ol>                                                                                                                                                                                   |
| DOTs                                | <ol style="list-style-type: none"> <li>1. Family based</li> <li>2. Community volunteer</li> <li>3. Health worker</li> </ol>                                                                                                                                                      |
| Duration of TB treatment in months  |                                                                                                                                                                                                                                                                                  |
| If diagnosed with DR-TB, which type | <ol style="list-style-type: none"> <li>1. RR</li> <li>2. MDR</li> <li>3. XDR</li> </ol>                                                                                                                                                                                          |
| Risk group                          | <ol style="list-style-type: none"> <li>1. Health worker</li> <li>2. TB contact</li> <li>3. Prisoner</li> <li>4. Refugee</li> <li>5. Armed forces</li> <li>6. Fisher folk</li> <li>7. Diabetic patient</li> <li>8. Miner</li> <li>9. Tobacco</li> <li>10. Mentally ill</li> </ol> |
